# Supplementary material for: A rapid spread of the stony coral tissue loss disease outbreak in the Mexican Caribbean
Source: PeerJ journal article supplement (doi:10.7717/peerj.8069), 2019-11-26

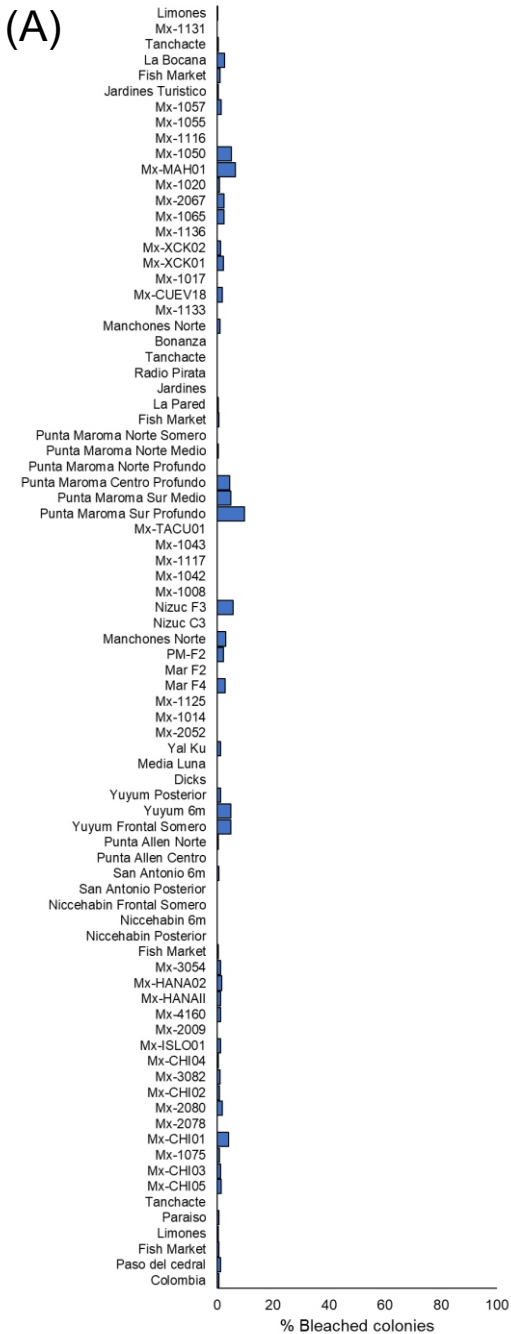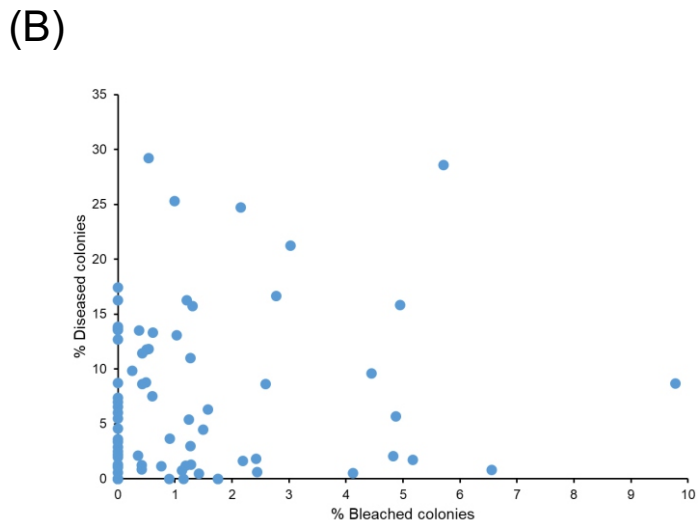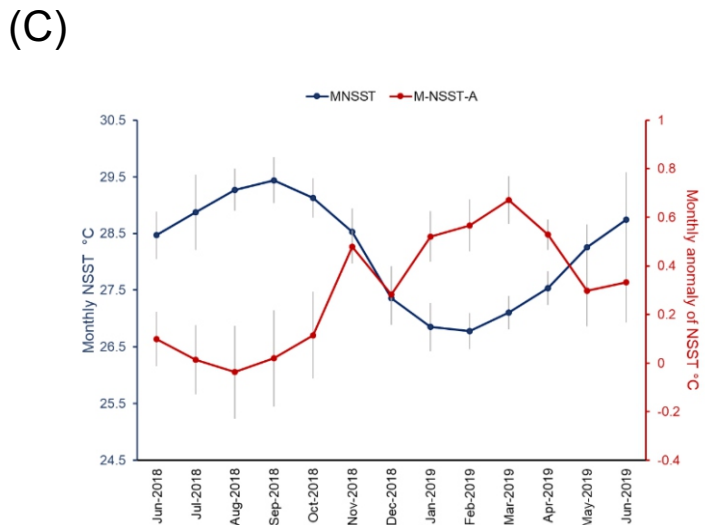

Supplement: Fig._S1_1.pdf [file Fig._S1_1.pdf]
